# Supplementary material
Source: HighWire-hosted journal article supplement (https://www.cmaj.ca/highwire/filestream/59049/field_highwire_adjunct_files/2/enjoy-steptoe-3-at.pdf)
Supplement: enjoy-steptoe-3-at.pdf [file enjoy-steptoe-3-at.pdf]

**Appendix 3 (as supplied by the authors): Factors associated with positive affective wellbeing at baseline: individuals who completed the walk test at baseline**

|                               | <b>Baseline enjoyment of life</b> |                             |                          |          |
|-------------------------------|-----------------------------------|-----------------------------|--------------------------|----------|
|                               | <b>Low</b><br>(n = 665)           | <b>Medium</b><br>(n = 1681) | <b>High</b><br>(n = 619) | <b>p</b> |
| Sex: Men                      | 289 (43.5%)                       | 736 (43.8%)                 | 267 (43.1%)              | 0.9      |
| Women                         | 376 (56.5%)                       | 945 (56.2%)                 | 352 (56.9%)              |          |
| Age category: 60-69           | 382 (57.4%)                       | 953 (56.7%)                 | 436 (70.4%)              | 0.001    |
| 70-79                         | 228 (34.3%)                       | 578 (34.4%)                 | 159 (25.7%)              |          |
| 80+                           | 55 (8.3%)                         | 150 (8.9%)                  | 24 (3.9%)                |          |
| Ethnicity: Nonwhite           | 12 (1.8%)                         | 15 (0.9%)                   | 5 (0.7%)                 | 0.08     |
| Education: Lower              | 338 (50.8%)                       | 686 (40.8%)                 | 185 (29.9%)              | <0.001   |
| Intermediate                  | 220 (33.1%)                       | 620 (36.9%)                 | 229 (37.3%)              |          |
| Higher                        | 107 (16.1%)                       | 375 (22.3%)                 | 205 (33.1%)              |          |
| Wealth quintile: 1 (lowest)   | 121 (18.8%)                       | 189 (11.5%)                 | 51 (8.3%)                | <0.001   |
| 2                             | 136 (21.2%)                       | 278 (16.9%)                 | 96 (15.7%)               |          |
| 3                             | 143 (22.2%)                       | 357 (21.7%)                 | 124 (20.3%)              |          |
| 4                             | 138 (21.5%)                       | 394 (23.9%)                 | 131 (21.4%)              |          |
| 5 (highest)                   | 105 (16.3%)                       | 430 (26.1%)                 | 210 (34.3%)              |          |
| Marital status: Married       | 381 (57.3%)                       | 1124 (66.9%)                | 480 (77.5%)              | <0.001   |
| Paid employment               | 79 (11.9%)                        | 218 (13.0%)                 | 110 (17.8%)              | 0.002    |
| Limiting longstanding illness | 330 (49.6%)                       | 503 (29.9%)                 | 53 (8.6%)                | <0.001   |
| Coronary heart disease        | 121 (18.2%)                       | 228 (13.6%)                 | 39 (6.3%)                | <0.001   |
| Cancer                        | 43 (6.5%)                         | 108 (6.4%)                  | 40 (6.5%)                | 1.0      |
| Diabetes                      | 64 (9.6%)                         | 97 (5.8%)                   | 22 (3.6%)                | <0.001   |
| Arthritis                     | 278 (41.9%)                       | 530 (31.5%)                 | 136 (22.0%)              | <0.001   |
| Stroke                        | 45 (6.8%)                         | 64 (3.8%)                   | 7 (1.1%)                 | <0.001   |

---

**Baseline enjoyment of life**

|                                                     | <b>Low</b><br>(n = 665) | <b>Medium</b><br>(n = 1681) | <b>High</b><br>(n = 619) | <b>p</b> |
|-----------------------------------------------------|-------------------------|-----------------------------|--------------------------|----------|
| Chronic lung disease                                | 64 (9.6%)               | 102 (6.1%)                  | 15 (2.4%)                | <0.001   |
| History of depressive illness                       | 44 (6.6%)               | 48 (2.9%)                   | 14 (2.3%)                | <0.001   |
| Elevated depressive symptoms                        | 270 (40.6%)             | 267 (15.9%)                 | 24 (3.9%)                | <0.001   |
| Current smoker                                      | 123 (18.5%)             | 186 (11.1%)                 | 56 (9.0%)                | <0.001   |
| Vigorous or moderate activity more than once a week | 367 (55.2%)             | 1102 (65.8%)                | 486 (78.4%)              | <0.001   |
| Alcohol consumption daily or almost daily           | 175 (26.3%)             | 495 (29.4%)                 | 206 (33.3%)              | 0.006    |
| Impaired mobility                                   | 503 (75.6%)             | 1013 (60.3%)                | 226 (36.5%)              | <0.001   |
| Two or more impaired ADLs                           | 109 (16.4%)             | 92 (5.5%)                   | 6 (1.0%)                 | <0.001   |
| Gait speed m/s                                      | 0.79 ± 0.29             | 0.90 ± 0.27                 | 1.01 ± 0.26              | <0.001   |

---
